# Supplementary material
Source: MDPI journal article supplement (https://www.mdpi.com/2311-7524/9/10/1121)
Supplement: s1 [file s1]

# Supplementary material

**Table S1.** Soil chemical properties of all studied vineyards at 10 depths classified by site and land use.

|    | Depth<br>(cm) | pHw | pHk | C<br>-----%----- | N   | C/N  | OM<br>% | Nax | Kx  | Cax  | Mgx | SB   | Alx  | eCEC |
|----|---------------|-----|-----|------------------|-----|------|---------|-----|-----|------|-----|------|------|------|
|    |               |     |     |                  |     |      |         |     |     |      |     |      |      |      |
|    | 0-2           | 7.0 | 6.3 | 9.1              | 0.6 | 14.6 | 15.6    | 1.5 | 1.7 | 19.5 | 4.4 | 27.1 | <0.7 | 27.1 |
|    | 2-4           | 6.5 | 5.6 | 3.8              | 0.2 | 17.4 | 6.6     | 1.3 | 1.1 | 8.9  | 2.2 | 13.5 | <0.7 | 13.5 |
|    | 4-6           | 5.8 | 4.9 | 2.3              | 0.1 | 20.5 | 3.9     | 1.0 | 0.8 | 5.8  | 1.8 | 9.4  | <0.7 | 9.4  |
|    | 6-8           | 5.3 | 4.3 | 2.0              | 0.1 | 21.9 | 3.4     | 0.4 | 0.8 | 4.4  | 1.6 | 7.2  | <0.7 | 7.2  |
|    | 8-10          | 5.1 | 3.9 | 1.8              | 0.1 | 24.5 | 3.0     | 0.4 | 0.7 | 3.4  | 1.3 | 5.9  | 0.6  | 6.5  |
|    | 10-15         | 4.8 | 3.5 | 1.7              | 0.1 | 23.2 | 2.9     | 0.4 | 0.7 | 2.0  | 1.1 | 4.1  | 1.4  | 5.5  |
|    | 15-20         | 4.5 | 3.4 | 1.9              | 0.1 | 19.8 | 3.3     | 0.4 | 0.7 | 2.2  | 0.9 | 4.3  | 2.3  | 6.5  |
|    | 20-30         | 4.5 | 3.4 | 1.9              | 0.1 | 20.2 | 3.3     | 0.4 | 0.7 | 2.2  | 0.8 | 4.0  | 2.5  | 6.5  |
|    | 30-40         | 4.7 | 3.5 | 1.7              | 0.1 | 23.9 | 2.9     | 0.3 | 0.7 | 2.6  | 0.9 | 4.6  | 1.2  | 5.8  |
|    | 40-50         | 5.1 | 3.8 | 1.3              | 0.1 | 21.7 | 2.3     | 0.4 | 0.8 | 3.2  | 1.2 | 5.6  | 0.5  | 6.1  |
| PM | 0-2           | 6.2 | 5.6 | 9.6              | 0.5 | 20.8 | 16.5    | 0.3 | 1.4 | 15.6 | 6.9 | 24.1 | <0.7 | 24.1 |
|    | 2-4           | 5.8 | 5.0 | 6.7              | 0.3 | 22.2 | 11.6    | 0.4 | 1.2 | 9.5  | 5.1 | 16.3 | <0.7 | 16.3 |
|    | 4-6           | 5.4 | 4.4 | 5.0              | 0.2 | 23.9 | 8.5     | 0.4 | 1.1 | 6.8  | 4.2 | 12.6 | <0.7 | 12.6 |
|    | 6-8           | 5.1 | 4.3 | 4.7              | 0.2 | 26.7 | 8.1     | 0.3 | 1.0 | 6.2  | 3.6 | 11.1 | <0.7 | 11.1 |
|    | 8-10          | 5.1 | 4.0 | 3.3              | 0.1 | 31.7 | 5.7     | 0.3 | 1.0 | 4.5  | 3.1 | 9.0  | <0.7 | 9.0  |
|    | 10-15         | 4.9 | 3.8 | 2.8              | 0.1 | 35.5 | 4.8     | 0.4 | 0.9 | 4.1  | 2.7 | 8.0  | 0.4  | 8.4  |
|    | 15-20         | 4.8 | 3.6 | 2.1              | 0.1 | 40.7 | 3.7     | 0.3 | 0.7 | 3.3  | 2.0 | 6.3  | 0.7  | 6.9  |
|    | 20-30         | 5.0 | 3.8 | 1.9              | 0.1 | 35.3 | 3.3     | 0.3 | 0.5 | 3.9  | 2.1 | 6.8  | 0.5  | 7.3  |
|    | 30-40         | 5.1 | 3.8 | 1.9              | 0.1 | 33.1 | 3.2     | 0.3 | 0.4 | 4.4  | 2.6 | 7.6  | <0.7 | 7.6  |
|    | 40-50         | 5.1 | 3.9 | 1.8              | 0.0 | 36.4 | 3.0     | 0.2 | 0.3 | 4.3  | 2.4 | 7.2  | <0.7 | 7.2  |
|    | 0-2           | 6.9 | 6.2 | 6.1              | 0.4 | 14.7 | 10.5    | 0.3 | 1.4 | 14.6 | 4.3 | 20.6 | <0.7 | 20.6 |
|    | 2-4           | 6.3 | 5.3 | 2.7              | 0.2 | 15.5 | 4.7     | 0.2 | 0.8 | 7.5  | 2.8 | 11.3 | <0.7 | 11.3 |
|    | 4-6           | 5.7 | 4.4 | 1.7              | 0.1 | 18.0 | 3.0     | 0.2 | 0.4 | 4.3  | 1.7 | 6.5  | <0.7 | 6.5  |
|    | 6-8           | 5.1 | 3.8 | 1.9              | 0.1 | 16.5 | 3.2     | 0.1 | 0.4 | 3.6  | 1.3 | 5.4  | 1.2  | 6.6  |
|    | 8-10          | 4.7 | 3.5 | 1.6              | 0.1 | 17.9 | 2.8     | 0.2 | 0.3 | 2.5  | 0.9 | 3.9  | 2.5  | 6.4  |
|    | 10-15         | 4.6 | 3.5 | 1.4              | 0.1 | 18.3 | 2.5     | 0.2 | 0.3 | 2.7  | 0.9 | 4.1  | 2.7  | 6.8  |
|    | 15-20         | 4.6 | 3.3 | 1.7              | 0.1 | 16.7 | 2.9     | 0.1 | 0.2 | 2.6  | 0.9 | 3.9  | 4.2  | 8.0  |
|    | 20-30         | 4.5 | 3.3 | 1.8              | 0.1 | 15.6 | 3.0     | 0.1 | 0.2 | 2.9  | 0.9 | 4.1  | 2.9  | 7.1  |
|    | 30-40         | 4.9 | 3.5 | 0.8              | 0.0 | 18.2 | 1.4     | 0.3 | 0.2 | 3.8  | 1.3 | 5.6  | 1.0  | 6.7  |
|    | 40-50         | 5.0 | 3.6 | 0.8              | 0.0 | 17.5 | 1.4     | 0.1 | 0.1 | 3.2  | 1.0 | 4.5  | 1.3  | 5.8  |

|    |       |     |     |      |     |      |      |     |     |      |      |      |      |      |
|----|-------|-----|-----|------|-----|------|------|-----|-----|------|------|------|------|------|
| AB | 0-2   | 5.6 | 5.2 | 18.0 | 0.8 | 21.4 | 31.1 | 0.3 | 1.1 | 23.4 | 10.6 | 35.5 | <0.7 | 35.5 |
|    | 2-4   | 5.4 | 4.9 | 14.6 | 0.7 | 20.2 | 25.1 | 0.2 | 1.0 | 17.5 | 7.6  | 26.3 | <0.7 | 26.3 |
|    | 4-6   | 5.5 | 4.4 | 3.9  | 0.2 | 20.7 | 6.8  | 0.2 | 0.8 | 8.5  | 4.5  | 14.0 | <0.7 | 14.0 |
|    | 6-8   | 5.5 | 4.2 | 2.3  | 0.1 | 17.7 | 3.9  | 0.2 | 0.7 | 6.3  | 3.8  | 11.1 | <0.7 | 11.1 |
|    | 8-10  | 5.5 | 4.3 | 2.4  | 0.1 | 19.5 | 4.1  | 0.2 | 0.7 | 6.3  | 3.8  | 11.0 | <0.7 | 11.0 |
|    | 10-15 | 5.5 | 4.3 | 1.7  | 0.1 | 20.7 | 2.9  | 0.2 | 0.7 | 5.8  | 3.6  | 10.3 | <0.7 | 10.3 |
|    | 15-20 | 5.6 | 4.3 | 1.0  | 0.1 | 11.2 | 1.8  | 0.2 | 0.5 | 5.9  | 3.2  | 9.7  | <0.7 | 9.7  |
|    | 20-30 | 5.4 | 3.9 | 1.5  | 0.1 | 25.3 | 2.6  | 0.2 | 0.4 | 7.3  | 3.5  | 11.5 | <0.7 | 11.5 |
|    | 30-40 | 5.3 | 3.5 | 1.8  | 0.0 | 50.6 | 3.1  | 0.4 | 0.2 | 9.7  | 4.5  | 14.7 | <0.7 | 14.7 |
|    | 40-50 | 5.2 | 3.3 | 1.3  | 0.0 | 38.3 | 2.3  | 0.4 | 0.2 | 13.0 | 6.0  | 19.6 | 0.7  | 20.3 |
| AC | 0-2   | 6.5 | 5.6 | 4.9  | 0.4 | 12.3 | 8.5  | 0.3 | 2.9 | 19.8 | 1.7  | 24.7 | 0.0  | 24.7 |
|    | 2-4   | 6.0 | 5.0 | 2.6  | 0.2 | 11.9 | 4.4  | 0.3 | 1.5 | 13.3 | 2.5  | 17.6 | 0.0  | 17.7 |
|    | 4-6   | 5.8 | 4.6 | 1.7  | 0.1 | 12.7 | 3.0  | 0.3 | 1.3 | 12.8 | 2.6  | 17.0 | 0.0  | 17.0 |
|    | 6-8   | 5.7 | 4.5 | 1.8  | 0.1 | 12.2 | 3.1  | 0.3 | 1.1 | 11.9 | 2.5  | 15.9 | 0.1  | 16.0 |
|    | 8-10  | 5.5 | 4.3 | 1.3  | 0.1 | 11.7 | 2.3  | 0.3 | 1.1 | 10.8 | 2.4  | 14.6 | 0.1  | 14.7 |
|    | 10-15 | 5.3 | 4.0 | 0.9  | 0.1 | 11.9 | 1.5  | 0.3 | 1.0 | 10.1 | 2.3  | 13.7 | 0.3  | 14.0 |
|    | 15-20 | 5.0 | 3.6 | 0.6  | 0.1 | 10.0 | 1.0  | 0.3 | 0.9 | 8.3  | 2.1  | 11.6 | 0.8  | 12.5 |
|    | 20-30 | 4.9 | 3.5 | 0.5  | 0.1 | 8.5  | 0.8  | 0.3 | 0.8 | 6.0  | 1.6  | 8.8  | 1.6  | 10.4 |
|    | 30-40 | 5.0 | 3.4 | 0.5  | 0.1 | 9.9  | 0.9  | 0.3 | 0.8 | 8.7  | 1.9  | 11.7 | 1.2  | 12.9 |
|    | 40-50 | 5.0 | 3.4 | 0.5  | 0.1 | 9.6  | 0.9  | 0.3 | 0.7 | 9.4  | 2.1  | 12.5 | 1.0  | 13.4 |
| AR | 0-2   | 6.3 | 5.6 | 8.6  | 0.5 | 16.0 | 14.8 | 0.4 | 0.9 | 19.6 | 3.0  | 23.9 | 0.0  | 24.0 |
|    | 2-4   | 6.2 | 5.3 | 5.1  | 0.3 | 15.3 | 8.9  | 0.4 | 0.9 | 14.3 | 2.8  | 18.4 | 0.0  | 18.4 |
|    | 4-6   | 5.7 | 4.7 | 3.1  | 0.2 | 13.1 | 5.3  | 0.3 | 0.8 | 8.2  | 2.3  | 11.6 | 0.0  | 11.7 |
|    | 6-8   | 5.2 | 4.3 | 2.2  | 0.2 | 12.8 | 3.8  | 0.3 | 0.8 | 5.0  | 1.8  | 8.0  | 0.2  | 8.2  |
|    | 8-10  | 5.2 | 4.0 | 1.6  | 0.1 | 14.4 | 2.7  | 0.3 | 0.9 | 3.3  | 1.5  | 5.9  | 0.6  | 6.6  |
|    | 10-15 | 5.0 | 3.7 | 1.2  | 0.1 | 12.5 | 2.1  | 0.3 | 0.8 | 2.6  | 1.3  | 5.0  | 1.3  | 6.3  |
|    | 15-20 | 4.9 | 3.6 | 1.1  | 0.1 | 13.1 | 1.9  | 0.3 | 0.7 | 2.5  | 1.4  | 4.9  | 1.5  | 6.4  |
|    | 20-30 | 4.8 | 3.6 | 0.9  | 0.1 | 12.4 | 1.6  | 0.3 | 0.6 | 2.4  | 1.4  | 4.7  | 1.7  | 6.4  |
|    | 30-40 | 4.7 | 3.5 | 0.9  | 0.1 | 12.8 | 1.5  | 0.3 | 0.5 | 2.6  | 1.1  | 4.5  | 1.9  | 6.5  |
|    | 40-50 | 5.0 | 3.6 | 0.7  | 0.1 | 10.8 | 1.1  | 0.3 | 0.5 | 4.5  | 0.9  | 6.3  | 0.9  | 7.3  |

AC and AB indicate active and abandoned vineyards, respectively. pHw and pHk indicate pH measured in water and in KCl 1N, respectively. C, N and C/N corresponded to total carbon, total nitrogen (both expressed as percentage) and total carbon and total nitrogen ratio, respectively. OM represents soil organic matter content expressed as percentage. Nax, Kx, Cax, Mgx represent the exchangeable Na, K, Ca and Mg extracted with 1N NH<sub>4</sub>Cl and SB indicates sum of bases, all of them expressed as cmol<sub>+</sub> kg<sup>-1</sup>. Alx and cCEC represents the exchangeable Al and the effective cation exchange capacity, both expressed as cmol<sub>+</sub> kg<sup>-1</sup>.
